# Supplementary material for: Identification of mRNA-miRNA-lncRNA Competing Endogenous RNA&nbsp;Network in Adrenocortical Carcinoma Using Bioinformatics Analysis&nbsp;
Source: Research Square preprint supplement (doi:10.21203/rs.3.rs-105353/v1), 2020-11-17
Supplement: Supplementary file 1 [file dd7b59c93bf5e36548060c2a.docx]

**Table S3. The lncRNA-miRNA pairs predicted by miRNet database.**

| miRNA | lncRNA |
| --- | --- |
| hsa-mir-212-3p | LINC01359 |
| hsa-mir-212-3p | MIR137HG |
| hsa-mir-212-3p | LINC00538 |
| hsa-mir-212-3p | STARD7-AS1 |
| hsa-mir-212-3p | SH3BP5-AS1 |
| hsa-mir-212-3p | ZBTB20-AS1 |
| hsa-mir-212-3p | MBNL1-AS1 |
| hsa-mir-212-3p | LPP-AS2 |
| hsa-mir-212-3p | HCG18 |
| hsa-mir-212-3p | SNHG5 |
| hsa-mir-212-3p | SND1-IT1 |
| hsa-mir-212-3p | KRTAP5-AS1 |
| hsa-mir-212-3p | KCNQ1OT1 |
| hsa-mir-212-3p | NEAT1 |
| hsa-mir-212-3p | BACE1-AS |
| hsa-mir-212-3p | USP2-AS1 |
| hsa-mir-212-3p | VASH1-AS1 |
| hsa-mir-212-3p | GABPB1-IT1 |
| hsa-mir-212-3p | NPTN-IT1 |
| hsa-mir-212-3p | RRN3P2 |
| hsa-mir-212-3p | COX10-AS1 |
| hsa-mir-212-3p | MAPT-IT1 |
| hsa-mir-212-3p | SNHG16 |
| hsa-mir-212-3p | ZNF337-AS1 |
| hsa-mir-212-3p | TUG1 |
| hsa-mir-212-3p | XIST |
| hsa-mir-212-3p | LINC00893 |
| hsa-mir-24-3p | LINC01128 |
| hsa-mir-24-3p | TNFRSF14-AS1 |
| hsa-mir-24-3p | NPPA-AS1 |
| hsa-mir-24-3p | ERI3-IT1 |
| hsa-mir-24-3p | ADAMTSL4-AS1 |
| hsa-mir-24-3p | ASH1L-AS1 |
| hsa-mir-24-3p | IPO9-AS1 |
| hsa-mir-24-3p | LINC01703 |
| hsa-mir-24-3p | LINC01115 |
| hsa-mir-24-3p | LBX2-AS1 |
| hsa-mir-24-3p | CYTOR |
| hsa-mir-24-3p | MIR4435-2HG |
| hsa-mir-24-3p | KLF7-IT1 |
| hsa-mir-24-3p | ACVR2B-AS1 |
| hsa-mir-24-3p | PTPRG-AS1 |
| hsa-mir-24-3p | CLRN1-AS1 |
| hsa-mir-24-3p | MUC20-OT1 |
| hsa-mir-24-3p | NOP14-AS1 |
| hsa-mir-24-3p | LINC01554 |
| hsa-mir-24-3p | LINC01184 |
| hsa-mir-24-3p | HOXA11-AS |
| hsa-mir-24-3p | SNHG15 |
| hsa-mir-24-3p | PAXIP1-AS1 |
| hsa-mir-24-3p | EXTL3-AS1 |
| hsa-mir-24-3p | CASC19 |
| hsa-mir-24-3p | PVT1 |
| hsa-mir-24-3p | EBLN3P |
| hsa-mir-24-3p | C9orf106 |
| hsa-mir-24-3p | LINC00963 |
| hsa-mir-24-3p | CCDC183-AS1 |
| hsa-mir-24-3p | C9orf139 |
| hsa-mir-24-3p | GATA3-AS1 |
| hsa-mir-24-3p | OLMALINC |
| hsa-mir-24-3p | KRTAP5-AS1 |
| hsa-mir-24-3p | KCNQ1OT1 |
| hsa-mir-24-3p | NEAT1 |
| hsa-mir-24-3p | ALG1L9P |
| hsa-mir-24-3p | DLEU1 |
| hsa-mir-24-3p | GAS6-AS1 |
| hsa-mir-24-3p | DHRS4-AS1 |
| hsa-mir-24-3p | FRMD6-AS1 |
| hsa-mir-24-3p | VASH1-AS1 |
| hsa-mir-24-3p | DIO3OS |
| hsa-mir-24-3p | DRAIC |
| hsa-mir-24-3p | MMP25-AS1 |
| hsa-mir-24-3p | SLX1B-SULT1A4 |
| hsa-mir-24-3p | SLX1A-SULT1A3 |
| hsa-mir-24-3p | FENDRR |
| hsa-mir-24-3p | MIR22HG |
| hsa-mir-24-3p | MIR497HG |
| hsa-mir-24-3p | LINC00909 |
| hsa-mir-24-3p | LINC00662 |
| hsa-mir-24-3p | PTOV1-AS2 |
| hsa-mir-24-3p | A1BG-AS1 |
| hsa-mir-24-3p | NRSN2-AS1 |
| hsa-mir-24-3p | RALY-AS1 |
| hsa-mir-24-3p | GNAS-AS1 |
| hsa-mir-24-3p | BACH1-IT3 |
| hsa-mir-24-3p | LINC00313 |
| hsa-mir-24-3p | LINC01669 |
| hsa-mir-24-3p | TSPEAR-AS2 |
| hsa-mir-24-3p | MCM3AP-AS1 |
| hsa-mir-24-3p | DUXAP8 |
| hsa-mir-24-3p | ADORA2A-AS1 |
| hsa-mir-24-3p | LINC01521 |
| hsa-mir-24-3p | MIRLET7BHG |
| hsa-mir-24-3p | INE1 |
| hsa-mir-24-3p | LINC00630 |
| hsa-mir-24-3p | DANT2 |
| hsa-mir-24-3p | SLC25A5-AS1 |
| hsa-mir-24-3p | RAP2C-AS1 |
| hsa-mir-24-3p | LINC00893 |
| hsa-mir-24-3p | LINC00894 |
| hsa-let-7a-5p | ZNF436-AS1 |
| hsa-let-7a-5p | SNHG12 |
| hsa-let-7a-5p | MIR29B2CHG |
| hsa-let-7a-5p | LINC01806 |
| hsa-let-7a-5p | LMCD1-AS1 |
| hsa-let-7a-5p | MUC20-OT1 |
| hsa-let-7a-5p | LINC00885 |
| hsa-let-7a-5p | LINC02432 |
| hsa-let-7a-5p | SLC9A3-AS1 |
| hsa-let-7a-5p | LINC02242 |
| hsa-let-7a-5p | SNHG4 |
| hsa-let-7a-5p | CARMN |
| hsa-let-7a-5p | HEIH |
| hsa-let-7a-5p | HCG18 |
| hsa-let-7a-5p | IER3-AS1 |
| hsa-let-7a-5p | HOXA11-AS |
| hsa-let-7a-5p | TRG-AS1 |
| hsa-let-7a-5p | LINC00265 |
| hsa-let-7a-5p | STAG3L5P-PVRIG2P-PILRB |
| hsa-let-7a-5p | CDKN2B-AS1 |
| hsa-let-7a-5p | LINC00963 |
| hsa-let-7a-5p | NUTM2A-AS1 |
| hsa-let-7a-5p | OLMALINC |
| hsa-let-7a-5p | RPARP-AS1 |
| hsa-let-7a-5p | LINC01001 |
| hsa-let-7a-5p | KCNQ1OT1 |
| hsa-let-7a-5p | LINC00294 |
| hsa-let-7a-5p | NEAT1 |
| hsa-let-7a-5p | LINC02381 |
| hsa-let-7a-5p | TMPO-AS1 |
| hsa-let-7a-5p | HELLPAR |
| hsa-let-7a-5p | G2E3-AS1 |
| hsa-let-7a-5p | VASH1-AS1 |
| hsa-let-7a-5p | MEG8 |
| hsa-let-7a-5p | OIP5-AS1 |
| hsa-let-7a-5p | IQCH-AS1 |
| hsa-let-7a-5p | DRAIC |
| hsa-let-7a-5p | THSD4-AS1 |
| hsa-let-7a-5p | UBL7-AS1 |
| hsa-let-7a-5p | ARHGAP27P1-BPTFP1-KPNA2P3 |
| hsa-let-7a-5p | SNHG16 |
| hsa-let-7a-5p | LINC01978 |
| hsa-let-7a-5p | TMEM147-AS1 |
| hsa-let-7a-5p | LINC00665 |
| hsa-let-7a-5p | ZNF571-AS1 |
| hsa-let-7a-5p | ZNF337-AS1 |
| hsa-let-7a-5p | MIR99AHG |
| hsa-let-7a-5p | LINC01678 |
| hsa-let-7a-5p | TTC28-AS1 |
| hsa-let-7a-5p | MIRLET7BHG |
| hsa-let-7a-5p | XIST |
| hsa-let-7a-5p | LINC00894 |
| hsa-let-7a-5p | TTTY15 |
| hsa-mir-196a-5p | SNHG3 |
| hsa-mir-196a-5p | GAS5 |
| hsa-mir-196a-5p | LMCD1-AS1 |
| hsa-mir-196a-5p | FGD5-AS1 |
| hsa-mir-196a-5p | EIF1B-AS1 |
| hsa-mir-196a-5p | LINC02035 |
| hsa-mir-196a-5p | SCAMP1-AS1 |
| hsa-mir-196a-5p | SNHG4 |
| hsa-mir-196a-5p | HCG18 |
| hsa-mir-196a-5p | LINC00472 |
| hsa-mir-196a-5p | HOXA10-AS |
| hsa-mir-196a-5p | TRG-AS1 |
| hsa-mir-196a-5p | UBR5-AS1 |
| hsa-mir-196a-5p | ARRDC1-AS1 |
| hsa-mir-196a-5p | H19 |
| hsa-mir-196a-5p | KCNQ1OT1 |
| hsa-mir-196a-5p | LINC00294 |
| hsa-mir-196a-5p | NEAT1 |
| hsa-mir-196a-5p | LINC00943 |
| hsa-mir-196a-5p | VASH1-AS1 |
| hsa-mir-196a-5p | IQCH-AS1 |
| hsa-mir-196a-5p | LOXL1-AS1 |
| hsa-mir-196a-5p | UBL7-AS1 |
| hsa-mir-196a-5p | ARHGAP27P1-BPTFP1-KPNA2P3 |
| hsa-mir-196a-5p | SNHG16 |
| hsa-mir-196a-5p | ZNF426-DT |
| hsa-mir-196a-5p | ZNF337-AS1 |
| hsa-mir-196a-5p | GNAS-AS1 |
| hsa-mir-196a-5p | LINC01678 |
| hsa-mir-196a-5p | TUG1 |
| hsa-mir-196a-5p | XIST |
| hsa-mir-196a-5p | FTX |
